# Supplementary material for: Bioactive Compounds and In Vitro Antioxidant Capacity of Cambuci and Uvaia: An Extensive Description of Little-Known Fruits from the Myrtaceae Family with High Consumption Potential
Source: MDPI journal article supplement (doi:10.3390/foods11172612), 2022-08-29
Supplement: s1 [file s1]

## Supplementary

### Bioactive compounds and in vitro antioxidant capacity of cambuci and uvaia: an extensive description of little known fruits from the Myrtaceae family with high consumption potential

Isabela Barroso Taver<sup>1</sup>, Poliana Cristina Spricigo<sup>1</sup>, Horst Bremer Neto<sup>1</sup>, Severino Matias de Alencar<sup>1</sup>, Adna Prado Massarioli<sup>1</sup> and Angelo Pedro Jacomino<sup>1</sup>

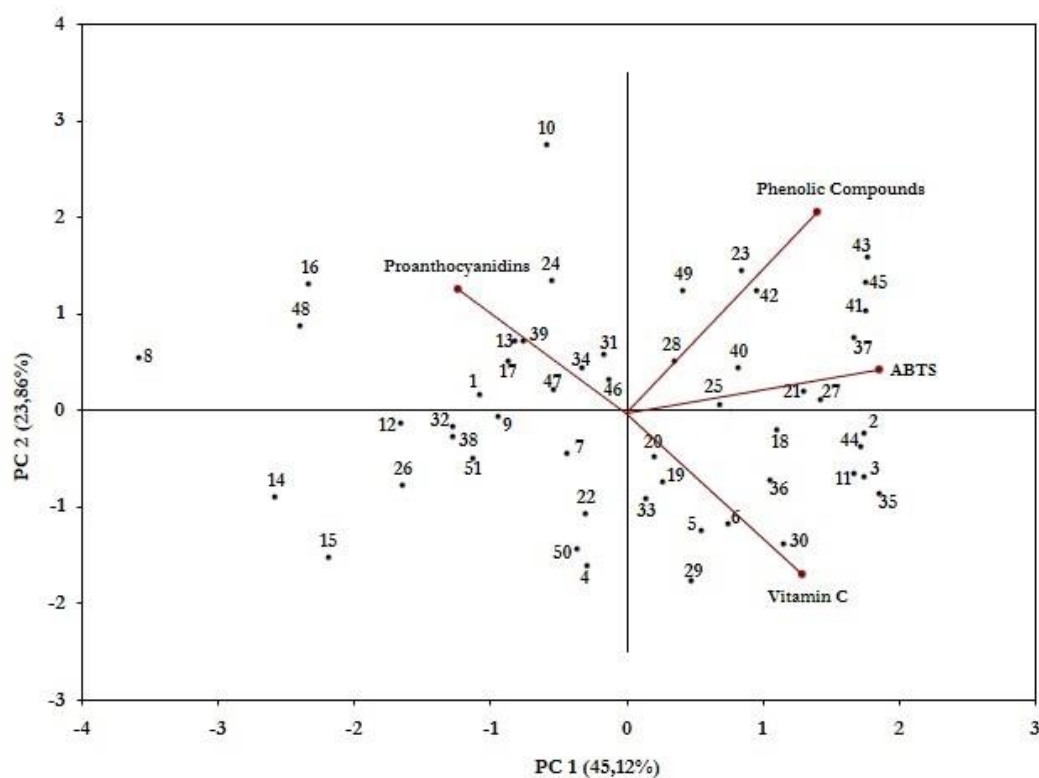

**Figure S1.** Principal component analysis (PCA) for the 51 cambuci accessions investigated herein indicating accession factorial plane projections.

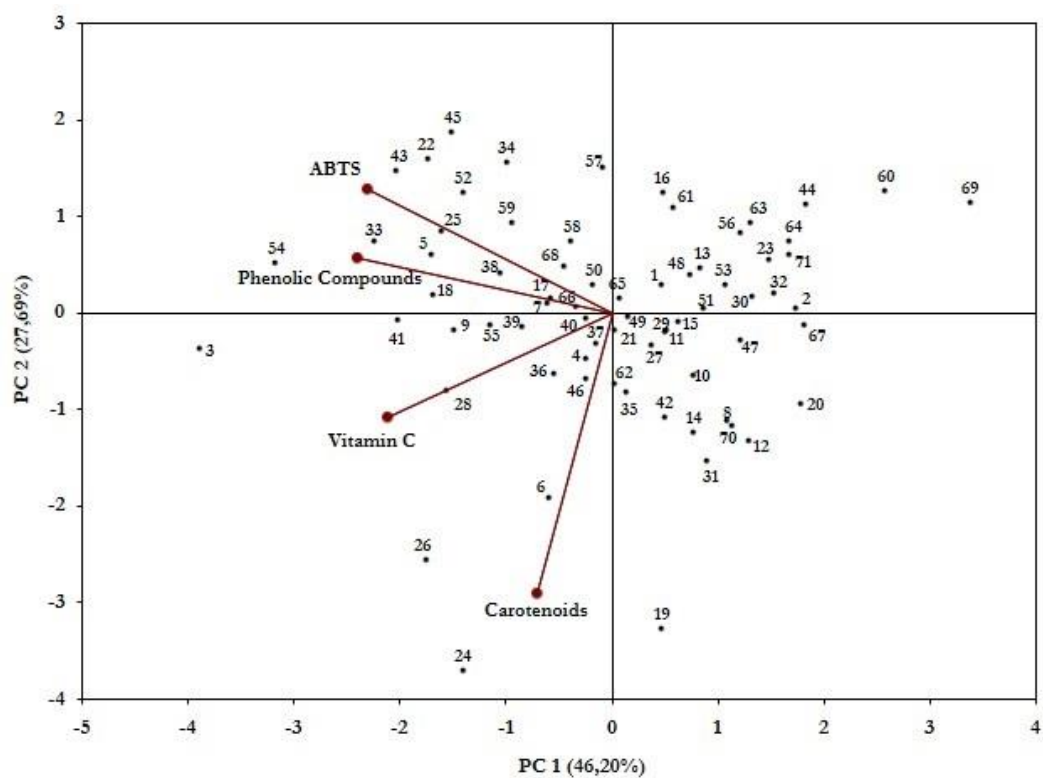

**Figure S2.** Principal component analysis (PCA) for the 71 uvaia accessions investigated herein indicating accession factorial plane projections.

**Table S1.** Vitamin C content, proanthocyanidins, total phenolic compounds and antioxidant capacity determined by the ABTS•+ method for the 51 cambuci accessions investigated herein (means followed by standard deviations).

| Accessions | Variables |   |            |   |            |   |           |   |
|------------|-----------|---|------------|---|------------|---|-----------|---|
|            | VIT.C     |   | PA         |   | CF         |   | ABTS      |   |
| 1          | 37.5±4.21 | j | 26.9±0.41  | g | 109±11.6   | e | 4.86±0.41 | d |
| 2          | 98.5±3.12 | c | 25.44±1.53 | g | 129±14.0   | d | 10.8±1.42 | a |
| 3          | 111±1.26  | b | 14.0±2.20  | k | 136±3.45   | c | 8.94±0.39 | b |
| 4          | 73.2±1.60 | f | 11.3±2.92  | k | 63.1±13.9  | h | 6.91±0.79 | c |
| 5          | 78.0±1.62 | e | 18.9±0.95  | i | 68.4±12.2  | h | 10.1±1.47 | b |
| 6          | 96.3±3.94 | c | 31.0±1.88  | f | 75.5±4.82  | g | 10.4±0.26 | a |
| 7          | 11.0±0.75 | n | 17.4±2.44  | j | 42.8±5.32  | i | 11.3±0.60 | a |
| 8          | 14.8±5.26 | m | 79.4±1.60  | b | 56.1±10.3  | h | 3.51±0.79 | e |
| 9          | 24.1±3.09 | l | 24.2±1.32  | h | 80.1±4.73  | g | 7.35±1.15 | c |
| 10         | 23.7±5.10 | l | 83.1±2.07  | b | 151±13.5   | b | 9.57±1.40 | b |
| 11         | 118±3.72  | a | 33.6±3.63  | f | 118±6.64   | d | 10.6±0.96 | a |
| 12         | 23.3±0.98 | l | 40.9±1.80  | e | 58.5±4.76  | h | 7.11±0.77 | c |
| 13         | 21.5±2.04 | l | 30.0±2.30  | f | 112±10.39  | e | 6.77±0.80 | c |
| 14         | 23.8±1.55 | l | 31.8±0.12  | f | 40.3±3.42  | i | 3.88±0.19 | e |
| 15         | 78.7±3.16 | e | 54.3±1.28  | c | 36.2±13.7  | i | 4.27±0.82 | d |
| 16         | 45.4±4.44 | i | 112±0.20   | a | 74.4±13.5  | g | 8.02±0.73 | c |
| 17         | 17.1±2.30 | m | 33.1±1.46  | f | 90.4±7.58  | f | 8.12±0.77 | c |
| 18         | 64.2±4.64 | g | 18.6±1.44  | i | 105±13.5   | e | 11.0±1.73 | a |
| 19         | 73.3±1.97 | f | 20.0±2.09  | i | 94.5±10.7  | f | 8.04±1.06 | c |
| 20         | 51.7±0.83 | h | 13.6±2.91  | k | 92.1±9.79  | f | 8.62±0.87 | b |
| 21         | 62.0±4.73 | g | 26.3±1.75  | g | 111±11.88  | e | 12.2±0.53 | a |
| 22         | 51.1±0.68 | h | 22.8±1.77  | h | 48.5±4.18  | i | 9.70±0.59 | b |
| 23         | 26.0±2.56 | l | 17.8±3.45  | j | 157±7.17   | b | 9.42±0.43 | b |
| 24         | 29.0±1.97 | k | 54.5±3.04  | c | 118.3±9.16 | d | 8.92±0.68 | b |
| 25         | 47.6±2.61 | i | 15.4±3.81  | j | 104±10.3   | e | 10.6±1.60 | a |
| 26         | 32.0±1.12 | k | 23.0±1.39  | h | 59.6±5.12  | h | 5.24±0.54 | d |

|        |            |   |           |   |           |   |           |   |
|--------|------------|---|-----------|---|-----------|---|-----------|---|
| 27     | 80.4±0.96  | d | 22.8±1.66 | h | 134±4.36  | c | 10.1±0.68 | b |
| 28     | 74.8±3.08  | f | 52.2±3.00 | d | 122±7.23  | d | 9.27±0.14 | b |
| 29     | 97.3±4.48  | c | 16.0±1.17 | j | 67.9±4.79 | h | 8.53±0.84 | b |
| 30     | 81.8±3.22  | d | 10.5±0.42 | l | 69.9±5.18 | h | 11.4±0.88 | a |
| 31     | 50.3±1.98  | j | 56.7±4.38 | c | 91.7±4.54 | f | 10.7±0.85 | a |
| 32     | 25.8±1.43  | l | 31.3±3.22 | f | 68.8±4.84 | h | 7.13±0.93 | c |
| 33     | 38.6±1.21  | j | 5.72±1.33 | m | 61.2±7.18 | h | 10.1±1.35 | b |
| 34     | 28.7±0.81  | k | 31.3±2.01 | f | 96.2±3.26 | f | 9.08±0.84 | b |
| 35     | 119±5.19   | a | 29.1±2.97 | f | 111±10.33 | e | 11.3±0.75 | a |
| 36     | 84.8±4.74  | d | 13.0±1.31 | k | 111±12.60 | e | 9.03±1.24 | b |
| 37     | 44.3±1.65  | i | 11.5±2.20 | k | 138±2.75  | c | 12.0±0.45 | a |
| 38     | 6.06±2.71  | o | 16.5±2.13 | j | 59.4±4.00 | h | 7.55±0.50 | c |
| 39     | 16.7±2.65  | m | 35.0±1.62 | f | 96.9±3.36 | f | 8.40±0.71 | b |
| 40     | 52.3±3.34  | h | 21.4±0.84 | i | 127±3.01  | d | 9.74±1.16 | b |
| 41     | 49.7±0.97  | h | 15.4±1.14 | j | 155±13.95 | b | 11.4±0.45 | a |
| 42     | 32.4±4.65  | k | 14.2±2.59 | k | 157±6.11  | b | 9.23±0.47 | b |
| 43     | 35.9±3.03  | j | 12.9±1.08 | k | 173±5.20  | a | 11.2±0.14 | a |
| 44     | 86.1±4.62  | d | 10.1±3.10 | l | 128±9.42  | d | 10.3±0.72 | a |
| 45     | 36.6±3.26  | j | 12.7±2.70 | k | 159±3.77  | b | 11.8±0.57 | a |
| 46     | 44.0±1.74  | i | 26.7±1.08 | g | 114±13.2  | e | 7.74±0.61 | c |
| 47     | 33.4±2.35  | j | 26.2±2.26 | g | 100±4.11  | e | 7.46±0.68 | c |
| 48     | 15.5±1.79  | m | 47.8±2.11 | d | 108±8.52  | e | 2.79±1.55 | e |
| 49     | 24.8±2.11  | l | 26.6±3.66 | g | 136±3.56  | c | 9.67±0.12 | b |
| 50     | 67.9±2.89  | g | 10.1±1.47 | l | 69.3±4.43 | h | 6.53±1.95 | a |
| 51     | 38.0 ±4.32 | j | 16.0±6.34 | j | 87.4±7.24 | f | 4.86±1.49 | d |
| Means  | 50.9       |   | 28.4      |   | 99.5      |   | 8.69      |   |
| CV (%) | 5.91       |   | 8.34      |   | 8.61      |   | 10.2      |   |

Each value is expressed as means (triplicate) ± standard deviations (SD). Means followed by the same letter do not differ statistically from each other. Vitamin C (VIT.C): mg 100 g<sup>-1</sup> VIT.C; proanthocyanidin (PA): mg 100 g<sup>-1</sup> CAT; phenolic compounds (CF): mg 100 g<sup>-1</sup> GAE; antioxidant activity determined by the ABTS<sup>++</sup> method: μmol g<sup>-1</sup> of trolox; ORAC antioxidant activity: μmol<sup>-1</sup> trolox; antioxidant activity by HOCl sequestration: EC<sub>50</sub> mg mL<sup>-1</sup>; CV (%): coefficient of variation. All data are significant at the 5% probability level (p < .05) (one-way ANOVA and Scott-Knott test at the 5% level).

**Table S2.** Vitamin C content, total carotenoids, total phenolic compounds and antioxidant capacity determined by the ABTS\*\* method of the 71 uvaia accessions investigated herein (means followed by standard deviations).

| Accessions | Variables |   |           |   |            |   |           |   |
|------------|-----------|---|-----------|---|------------|---|-----------|---|
|            | VIT.C     |   | CA        |   | CF         |   | ABTS      |   |
| 1          | 71.7±2.05 | k | 37.5±2.67 | g | 109.1±8.63 | e | 3.45±0.93 | j |
| 2          | 66.4±1.33 | l | 35.4±1.40 | g | 70.4±8.71  | h | 2.31±0.41 | l |
| 3          | 135±3.94  | b | 56.6±1.18 | g | 186.2±7.68 | a | 7.92±0.79 | e |
| 4          | 92.3±3.16 | h | 50.1±3.15 | e | 92.4±7.66  | f | 5.39±0.13 | h |
| 5          | 88.0±4.09 | h | 44.7±4.39 | f | 136±4.36   | c | 8.04±0.92 | e |
| 6          | 86.0±1.07 | h | 76.1±5.95 | b | 104.2±5.96 | e | 4.78±0.31 | h |
| 7          | 89.4±3.91 | h | 45.2±4.49 | f | 97.5±2.75  | f | 6.80±0.69 | f |
| 8          | 72.2±2.80 | j | 56.8±2.66 | d | 77.8±4.55  | g | 2.77±0.58 | k |
| 9          | 111±2.30  | e | 43.9±2.39 | f | 107±9.01   | e | 6.91±0.44 | f |
| 10         | 84.5±3.52 | h | 49.5±3.00 | e | 64.3±8.64  | i | 4.49±0.77 | h |
| 11         | 89.9±3.24 | h | 41.0±2.29 | f | 78.8±6.81  | g | 4.24±0.52 | i |
| 12         | 73.3±1.72 | j | 59.4±2.95 | d | 63.4±4.02  | i | 2.99±0.73 | k |
| 13         | 66.0±3.06 | l | 38.0±2.33 | g | 74.2±5.46  | h | 5.51±0.38 | h |
| 14         | 80.2±3.67 | i | 59.4±2.50 | d | 71.3±2.30  | h | 3.76±0.15 | j |
| 15         | 107±2.96  | e | 33.0±1.73 | h | 61.2±7.26  | i | 4.18±0.93 | i |
| 16         | 91.0±2.16 | h | 17.6±0.10 | k | 81.3±4.58  | g | 5.06±0.76 | h |
| 17         | 102±1.07  | f | 38.1±0.55 | g | 107±7.44   | e | 5.29±0.59 | h |
| 18         | 128±1.48  | c | 38.7±1.28 | g | 100±2.36   | e | 7.94±0.91 | e |
| 19         | 80.0±3.85 | i | 95.4±4.34 | a | 66.2±6.20  | h | 3.73±0.32 | j |
| 20         | 70.4±2.84 | k | 50.0±2.08 | e | 61.1±6.11  | i | 1.91±0.04 | l |
| 21         | 63.0±1.86 | l | 50.6±5.37 | e | 128±3.40   | d | 3.68±0.55 | j |
| 22         | 62.9±2.05 | l | 41.4±2.24 | f | 124±3.19   | d | 11.5±0.55 | b |
| 23         | 53.1±0.68 | m | 34.0±1.29 | h | 85.0±4.27  | g | 3.27±0.53 | j |
| 24         | 142±3.64  | a | 90.5±4.26 | a | 104±6.65   | e | 0.59±0.39 | k |
| 25         | 112±2.57  | e | 29.4±1.41 | i | 140±3.12   | c | 6.04±0.08 | g |
| 26         | 97.7±3.61 | g | 92.1±3.68 | a | 126±3.65   | d | 6.12±0.52 | g |

|    |           |   |           |   |            |   |           |   |
|----|-----------|---|-----------|---|------------|---|-----------|---|
| 27 | 74.8±5.40 | j | 51.2±3.97 | e | 77.1±6.93  | g | 5.72±0.56 | g |
| 28 | 112±3.25  | e | 58.0±2.56 | d | 113.8±3.30 | d | 6.74±0.73 | f |
| 29 | 54.4±2.82 | m | 50.8±2.80 | e | 115±1.43   | d | 3.65±0.68 | j |
| 30 | 66.0±1.57 | l | 35.7±1.89 | g | 86.6±3.30  | f | 2.59±0.35 | k |
| 31 | 92.3±2.43 | h | 57.5±2.82 | d | 73.9±4.18  | h | 2.10±0.68 | l |
| 32 | 75.2±3.03 | j | 30.9±0.84 | i | 73.5±5.97  | h | 2.31±0.36 | l |
| 33 | 135±2.78  | b | 29.8±1.28 | i | 122±1.70   | d | 8.10±0.57 | e |
| 34 | 75.6±2.88 | j | 29.5±1.45 | i | 121±5.92   | d | 8.32±0.36 | e |
| 35 | 121±3.15  | d | 43.4±4.57 | f | 63.9±2.14  | i | 4.25±0.11 | i |
| 36 | 109±1.45  | e | 48.8±3.32 | e | 92.9±3.40  | f | 5.24±0.35 | h |
| 37 | 94.8±3.35 | g | 45.9±1.34 | f | 92.1±1.84  | f | 5.02±0.35 | h |
| 38 | 103±4.01  | f | 38.7±1.99 | g | 102±4.33   | e | 7.33±0.69 | f |
| 39 | 100±2.20  | f | 42.3±2.66 | f | 127±6.04   | d | 5.25±0.63 | h |
| 40 | 98.0±2.69 | g | 40.3±1.88 | f | 101±5.70   | e | 4.66±0.49 | h |
| 41 | 110±3.90  | e | 47.6±2.50 | e | 151±1.65   | b | 6.08±0.08 | g |
| 42 | 75.4±3.07 | j | 59.9±3.14 | d | 86.8±2.39  | f | 3.92±0.33 | i |
| 43 | 77.9±3.68 | i | 36.6±2.59 | g | 154±6.95   | b | 9.07±0.29 | d |
| 44 | 34.8±0.62 | o | 31.9±3.96 | h | 63.5±2.96  | i | 5.40±0.48 | h |
| 45 | 77.3±2.16 | i | 29.7±3.13 | i | 118±3.21   | d | 10.4±0.41 | c |
| 46 | 90.5±1.48 | h | 50.2±1.33 | e | 125±5.11   | d | 2.75±0.46 | k |
| 47 | 71.0±3.08 | k | 43.4±3.26 | f | 75.0±8.80  | h | 3.21±0.65 | j |
| 48 | 65.7±1.10 | l | 37.1±2.69 | g | 95.5±3.17  | f | 4.08±0.12 | i |
| 49 | 88.9±3.82 | h | 40.9±2.83 | g | 89.5±7.33  | f | 4.76±0.58 | h |
| 50 | 82.2±1.78 | i | 38.7±3.03 | g | 116±5.03   | d | 4.49±0.34 | h |
| 51 | 95.4±0.53 | g | 33.2±0.76 | h | 61.4±5.43  | i | 4.17±0.45 | i |
| 52 | 92.8±1.72 | h | 35.2±1.00 | g | 89.7±5.29  | f | 10.9±0.64 | c |
| 53 | 77.9±3.16 | i | 33.7±0.31 | h | 68.7±6.68  | h | 4.18±0.69 | i |
| 54 | 105±3.97  | f | 55.7±6.94 | d | 122±2.09   | d | 13.2±0.70 | a |
| 55 | 74.6±3.92 | j | 56.8±3.00 | d | 129±7.34   | d | 6.71±0.71 | f |
| 56 | 70.9±2.03 | k | 25.4±4.58 | j | 79.1±4.45  | g | 3.71±0.16 | j |
| 57 | 105±0.34  | i | 22.0±2.32 | j | 102±2.53   | e | 6.43±0.28 | f |

|        |           |   |           |   |           |   |           |   |
|--------|-----------|---|-----------|---|-----------|---|-----------|---|
| 58     | 79.8±0.67 | i | 34.4±3.03 | h | 120±6.37  | d | 5.38±0.50 | h |
| 59     | 72.6±2.90 | j | 37.7±1.31 | g | 139±0.62  | c | 6.40±0.12 | f |
| 60     | 32.4±0.42 | o | 22.1±2.12 | j | 69.7±6.12 | h | 2.56±0.54 | k |
| 61     | 51.8±2.51 | m | 32.3±2.24 | h | 108±2.79  | e | 5.01±0.89 | h |
| 62     | 69.4±3.80 | k | 57.3±1.36 | d | 121±6.81  | d | 3.41±0.75 | j |
| 63     | 57.2±2.02 | m | 26.9±0.36 | j | 91.7±9.05 | f | 3.33±0.36 | j |
| 64     | 41.9±1.57 | n | 33.5±3.35 | h | 84.8±7.08 | g | 3.48±0.55 | j |
| 65     | 64.3±3.30 | l | 47.1±0.45 | e | 107±2.80  | e | 5.38±0.21 | h |
| 66     | 70.7±1.32 | k | 48.2±2.17 | e | 122±9.20  | d | 5.15±0.77 | h |
| 67     | 28.9±3.87 | o | 52.5±0.85 | e | 73.9±8.30 | h | 4.05±0.13 | i |
| 68     | 50.9±3.09 | m | 49.5±3.46 | e | 134±9.19  | c | 6.16±0.37 | g |
| 69     | 19.8±1.59 | p | 26.5±3.24 | j | 48.9±6.61 | i | 2.14±0.40 | l |
| 70     | 62.7±1.17 | l | 64.2±3.46 | c | 54.0±6.70 | i | 5.07±0.58 | h |
| 71     | 50.6±0.10 | m | 34.1±0.69 | h | 69.1±3.57 | h | 4.09±0.56 | i |
| Means  | 81.0      |   | 44.3      |   | 97.8      |   | 5.2       |   |
| CV (%) | 4.25      |   | 6.01      |   | 8.33      |   | 8.94      |   |

Each value is expressed as means (triplicate) ± standard deviation (SD). Means followed by the same letter do not differ statistically from each other. Vitamin C (VIT.C): mg 100 g<sup>-1</sup> VIT.C; total carotenoids (CA): µg g<sup>-1</sup>; phenolic compounds (CF): mg 100 g<sup>-1</sup> GAE; antioxidant activity by ABTS <sup>a</sup>+ method: µmol g<sup>-1</sup> of trolox; ORAC antioxidant activity: µmol g<sup>-1</sup> trolox; antioxidant activity by HOCl sequestration: EC<sub>50</sub> mg mL<sup>-1</sup>; CV (%): coefficient of variation. All data are significant at the 5% probability level (p < .05) (one-way ANOVA and Scott-Knott test at the 5% level).

**Table S3.** Accessions and sampling municipalities of the 51 cambuci accessions investigated herein.

| Accessions | Cambuci             |                      | Accessions | Cambuci         |                      |
|------------|---------------------|----------------------|------------|-----------------|----------------------|
|            | Municipalities      | Climate <sup>1</sup> |            | Municipalities  | Climate <sup>1</sup> |
| 1          | Paraibuna           | Cfb                  | 27         | Paraibuna       | Cfb                  |
| 2          | Paraibuna           | Cfb                  | 28         | Paraibuna       | Cfb                  |
| 3          | Paraibuna           | Cfb                  | 29         | Paraibuna       | Cfb                  |
| 4          | Paraibuna           | Cfb                  | 30         | Paraibuna       | Cfb                  |
| 5          | Paraibuna           | Cfb                  | 31         | Ribeirão Pires  | Cfa                  |
| 6          | Paraibuna           | Cfb                  | 32         | Ribeirão Pires  | Cfa                  |
| 7          | Paraibuna           | Cfb                  | 33         | Paranapiacaba   | Cfa                  |
| 8          | Mogi das Cruzes     | Cwa                  | 34         | Ribeirão Pires  | Cfa                  |
| 9          | Mogi das Cruzes     | Cwa                  | 35         | Paraibuna       | Cfb                  |
| 10         | Mogi das Cruzes     | Cwa                  | 36         | Paraibuna       | Cfb                  |
| 11         | Mogi das Cruzes     | Cwa                  | 37         | Paraibuna       | Cfb                  |
| 12         | Mogi das Cruzes     | Cwa                  | 38         | Mogi das Cruzes | Cwa                  |
| 13         | Mogi das Cruzes     | Cwa                  | 39         | Paranapiacaba   | Cfa                  |
| 14         | Juquitiba           | Cfa                  | 40         | Juquitiba       | Cfa                  |
| 15         | Juquitiba           | Cfa                  | 41         | Juquitiba       | Cfa                  |
| 16         | Juquitiba           | Cfa                  | 42         | Juquitiba       | Cfa                  |
| 17         | Juquitiba           | Cfa                  | 43         | Juquitiba       | Cfa                  |
| 18         | Juquitiba           | Cfa                  | 44         | Paraibuna       | Cfb                  |
| 19         | Juquitiba           | Cfa                  | 45         | Paraibuna       | Cfb                  |
| 20         | Rio Grande da Serra | Cfa                  | 46         | Paraibuna       | Cfb                  |
| 21         | Rio Grande da Serra | Cfa                  | 47         | Paraibuna       | Cfb                  |
| 22         | Rio Grande da Serra | Cfa                  | 48         | Paraibuna       | Cfb                  |
| 23         | Paraibuna           | Cfb                  | 49         | Paraibuna       | Cfb                  |
| 24         | Paraibuna           | Cfb                  | 50         | Paraibuna       | Cfb                  |
| 25         | Paraibuna           | Cfb                  | 51         | Paraibuna       | Cfb                  |
| 26         | Salesópolis         | Cfa                  |            |                 |                      |

<sup>1</sup> Köppen climate classification [50].



**Table S4.** Accessions and sampling municipalities of the 71 uvaia accessions investigated herein.

| Accessions | Uvaia          |                      | Accessions | Uvaia          |                      |
|------------|----------------|----------------------|------------|----------------|----------------------|
|            | Municipalities | Climate <sup>1</sup> |            | Municipalities | Climate <sup>1</sup> |
| 1          | Cabo Verde     | Cwa                  | 37         | Cabo Verde     | Cwa                  |
| 2          | Cabo Verde     | Cwa                  | 38         | Cabo Verde     | Cwa                  |
| 3          | Cabo Verde     | Cwa                  | 39         | Cabo Verde     | Cwa                  |
| 4          | Cabo Verde     | Cwa                  | 40         | Cabo Verde     | Cwa                  |
| 5          | Cabo Verde     | Cwa                  | 41         | Cabo Verde     | Cwa                  |
| 6          | Cabo Verde     | Cwa                  | 42         | Cabo Verde     | Cwa                  |
| 7          | Cabo Verde     | Cwa                  | 43         | Cabo Verde     | Cwa                  |
| 8          | Cabo Verde     | Cwa                  | 44         | Cabo Verde     | Cwa                  |
| 9          | Cabo Verde     | Cwa                  | 45         | Cabo Verde     | Cwa                  |
| 10         | Cabo Verde     | Cwa                  | 46         | Cabo Verde     | Cwa                  |
| 11         | Cabo Verde     | Cwa                  | 47         | Cabo Verde     | Cwa                  |
| 12         | Cabo Verde     | Cwa                  | 48         | Cabo Verde     | Cwa                  |
| 13         | Cabo Verde     | Cwa                  | 49         | Cabo Verde     | Cwa                  |
| 14         | Cabo Verde     | Cwa                  | 50         | Cabo Verde     | Cwa                  |
| 15         | Cabo Verde     | Cwa                  | 51         | Cabo Verde     | Cwa                  |
| 16         | Cabo Verde     | Cwa                  | 52         | Cabo Verde     | Cwa                  |
| 17         | Cabo Verde     | Cwa                  | 53         | Cabo Verde     | Cwa                  |
| 18         | Cabo Verde     | Cwa                  | 54         | Cabo Verde     | Cwa                  |
| 19         | Cabo Verde     | Cwa                  | 55         | Cabo Verde     | Cwa                  |
| 20         | Cabo Verde     | Cwa                  | 56         | Cabo Verde     | Cwa                  |
| 21         | Cabo Verde     | Cwa                  | 57         | Cabo Verde     | Cwa                  |
| 22         | Cabo Verde     | Cwa                  | 58         | Cabo Verde     | Cwa                  |
| 23         | Cabo Verde     | Cwa                  | 59         | Cabo Verde     | Cwa                  |
| 24         | Cabo Verde     | Cwa                  | 60         | Inconfidentes  | Cwa. Cwb             |
| 25         | Cabo Verde     | Cwa                  | 61         | Inconfidentes  | Cwa. Cwb             |
| 26         | Cabo Verde     | Cwa                  | 62         | Inconfidentes  | Cwa. Cwb             |
| 27         | Cabo Verde     | Cwa                  | 63         | Inconfidentes  | Cwa. Cwb             |
| 28         | Cabo Verde     | Cwa                  | 64         | Inconfidentes  | Cwa. Cwb             |
| 29         | Cabo Verde     | Cwa                  | 65         | Inconfidentes  | Cwa. Cwb             |
| 30         | Cabo Verde     | Cwa                  | 66         | Inconfidentes  | Cwa. Cwb             |
| 31         | Cabo Verde     | Cwa                  | 67         | Inconfidentes  | Cwa. Cwb             |
| 32         | Cabo Verde     | Cwa                  | 68         | Inconfidentes  | Cwa. Cwb             |
| 33         | Cabo Verde     | Cwa                  | 69         | Inconfidentes  | Cwa. Cwb             |
| 34         | Cabo Verde     | Cwa                  | 70         | Inconfidentes  | Cwa. Cwb             |
| 35         | Cabo Verde     | Cwa                  | 71         | Inconfidentes  | Cwa. Cwb             |
| 36         | Cabo Verde     | Cwa                  |            |                |                      |

<sup>1</sup> Köppen climate classification [50].
